# Supplementary material
Source: Springer Nature journal article supplement (https://www.springermedizin.de/resource/supplementary/12936_2005_191_MOESM3_ESM.pdf/9547140)

### A. Dry season

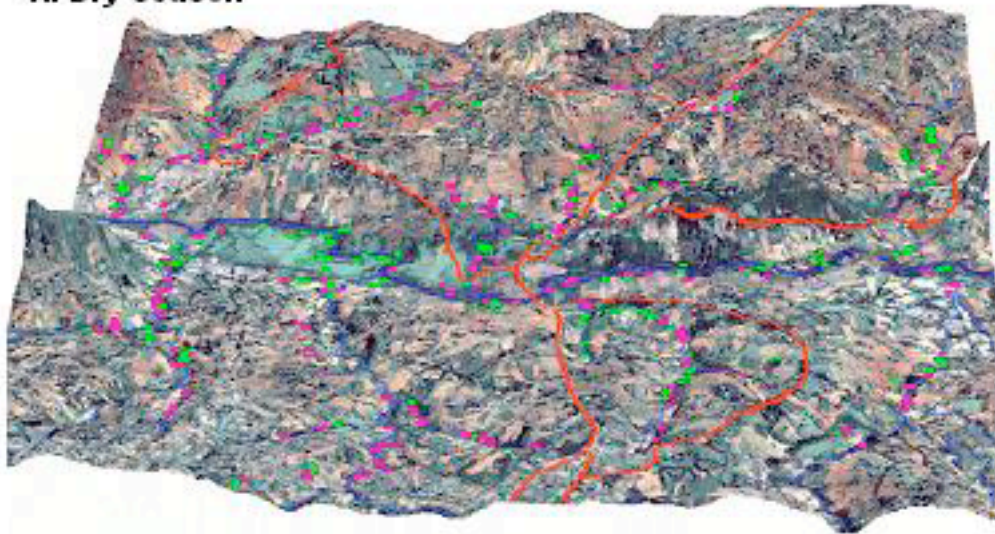

— Roads

— River/streams

■ Anopheline-positive habitats

■ Anopheline-negative habitats

### B. Rainy season

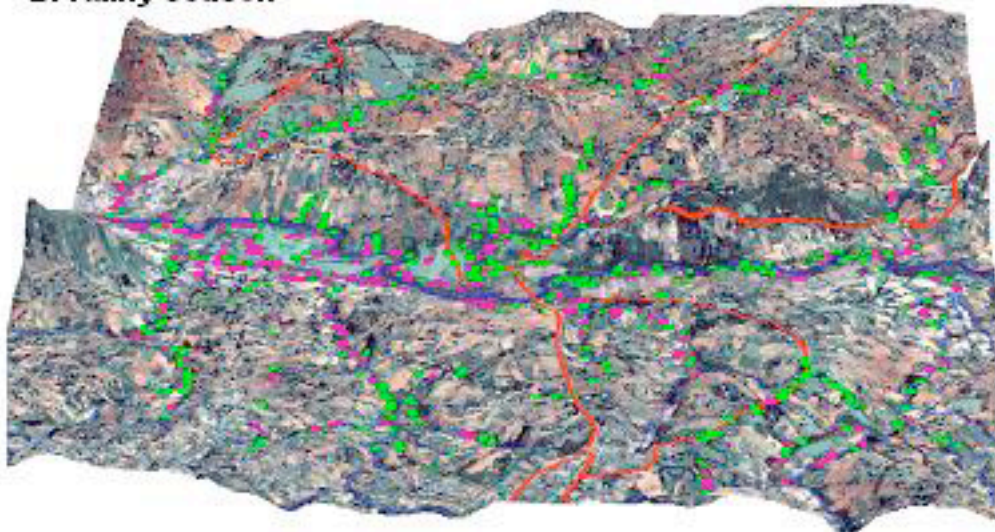

Supplement: MOESM3 [file 9547140]
